# Supplementary material for: Homogeneous dispersion and enhanced thermal properties of polystyrene-layered double hydroxide nanocomposites prepared by in situ reversible addition–fragmentation chain transfer (RAFT) polymerization
Source: Royal Society of Chemistry journal article supplement (doi:10.1039/b615334h), 2007-01-01
Supplement: b615334h.pdf [file b615334h.pdf]

Electronic Supplementary Information

**Homogeneous dispersion and enhanced thermal property of polystyrene-layered  
double hydroxide nanocomposites prepared by in situ reversible  
addition-fragmentation chain transfer (RAFT) polymerization**

*Peng Ding, Ming Zhang, Jing Gai, Baojun Qu* \*

State Key Laboratory of Fire Science and Department of Polymer Science and Engineering,  
University of Science and Technology of China (USTC), Hefei, Anhui 230026, P.R. China

E-mail: qubj@ustc.edu.cn

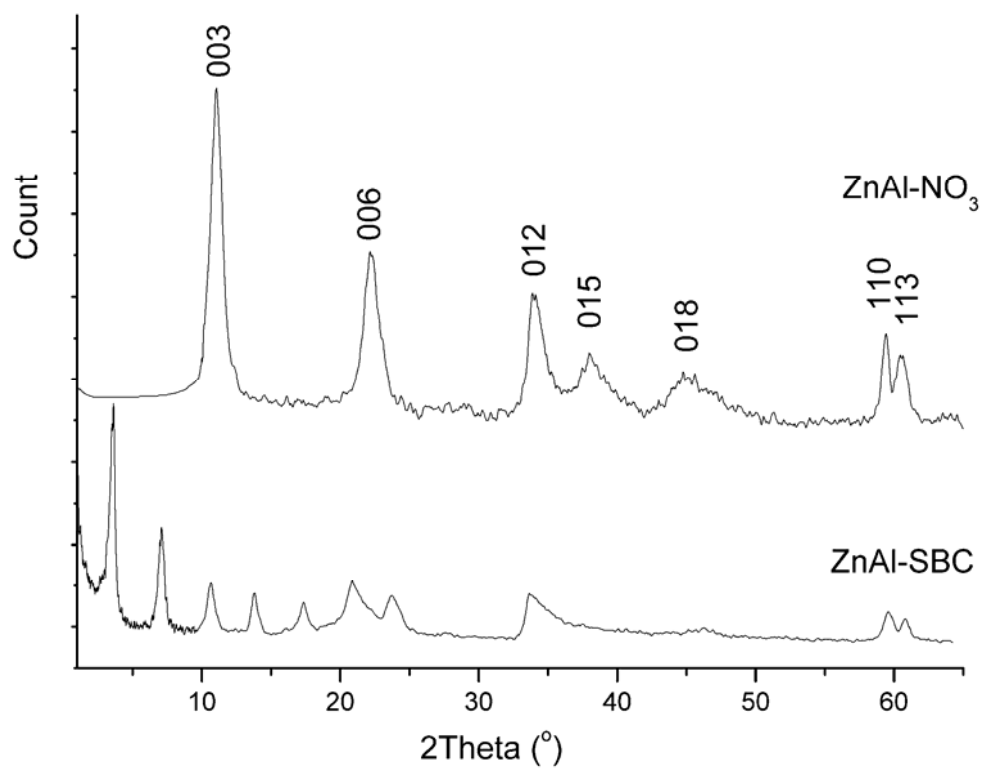

Figure S1. XRD patterns of the ZnAl-NO<sub>3</sub> and ZnAl-SBC samples.

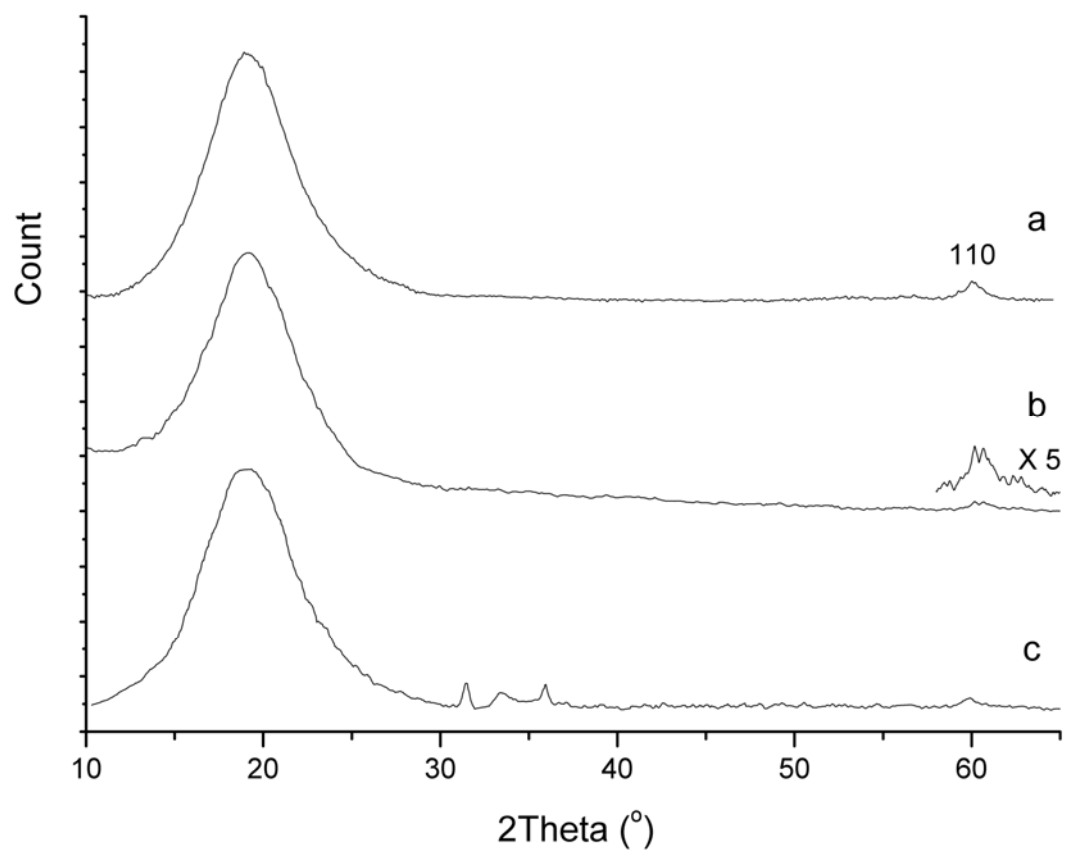

Figure S2. Wide-angle XRD patterns of the samples: a) NC2, b) NC1, and c) PS/LDH samples with 1 wt% LDH loading reacted for 1 h.

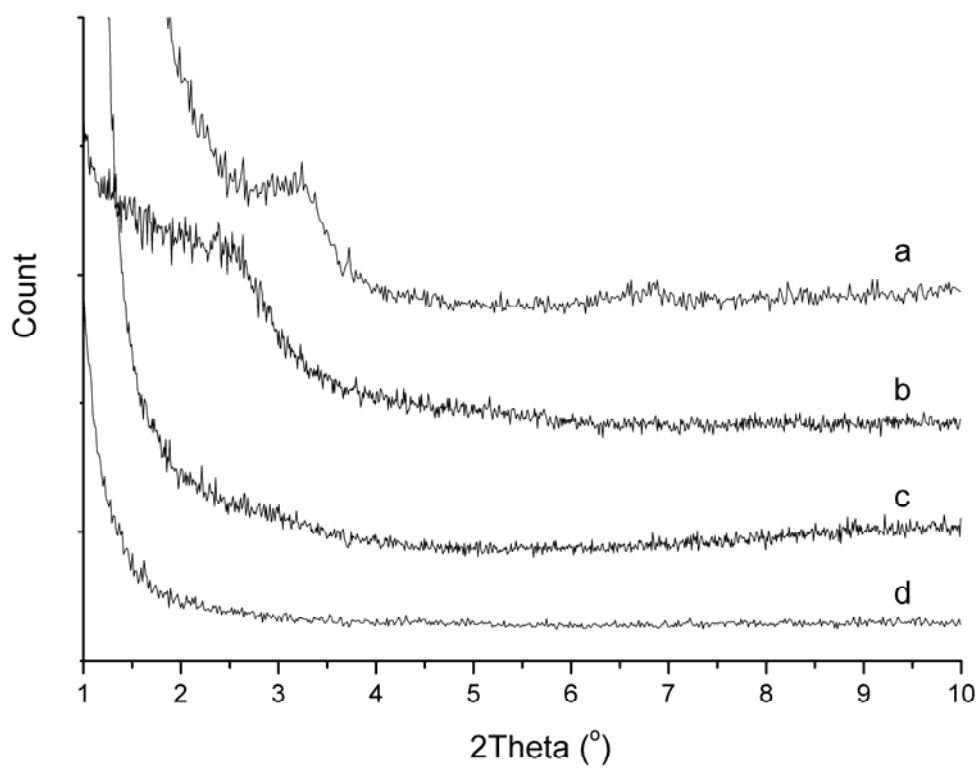

Figure S3. XRD patterns of PS/LDH samples with 1 wt% LDH reacted for a) 1 h, b) 2 h, c) 3 h, and d) 24 h.
